# Supplementary material
Source: publisher figshare collection journal article supplement (https://gsajournals.figshare.com/ndownloader/files/21488934)
Supplement: Supplementary file 1 [file 21488934]

## Sheet: geno_pheno
	line	SLBE1R1	NLBE1R1	GLSE1R1	3Dis	BLS_LsMeans	gw.lsm	M1	M2	M3	M4	M5	M6	M7	M8	M9	M10	M11	M12	M13	M14	M15	M16	M17	M18	M19	M20	M21	M22	M23	M24	M25	M26	M27	M28	M29	M30	M31	M32	M33	M34	M35	M36	M37	M38	M39	M40	M41	M42
1	DRIL78.001	6.41806	52.6109	6.16495	0.358445	31.0589	581.848	0	0	0	0	0	0	0	0	0	0	0	0	0	0	0	0	0	0	0	0	0	0	0	0	0	0	0	0	0	0	0	0	0	0	0	0	0	0	0	0	0	0
2	DRIL78.003	5.66129	55.0546	6.05985	-0.358073	24.4627	502.603	2	0	0	0	0	0	0	0	0	0	0	0	0	0	0	0	0	0	0	0	0	0	0	0	0	0	0	0	0	0	0	0	0	0	0	0	2	2	2	2	2	0
3	DRIL78.004	5.90175	56.6371	5.80311	-0.492788	41.9427	660.173	0	0	0	0	0	0	0	0	0	0	0	0	0	0	0	0	0	0	0	0	0	0	0	0	0	0	0	0	0	0	0	0	0	0	0	0	0	0	0	0	0	0
4	DRIL78.005	6.23933	38.0839	7.03191	1.82532	31.6069	345.991	0	0	0	0	0	0	0	0	0	0	0	0	0	0	0	0	0	0	0	0	0	0	0	0	0	0	0	0	0	0	0	0	0	0	0	0	0	0	0	0	0	0
5	DRIL78.006	5.47234	57.0171	6.15066	-0.543981	42.9292	654.863	0	0	0	0	0	0	0	0	0	0	0	0	0	0	0	0	0	0	0	0	0	0	0	0	0	0	0	0	0	0	0	0	0	0	0	0	0	0	0	0	0	0
6	DRIL78.008	5.71202	53.917	5.96225	-0.319422	30.9908	619.814	0	0	0	0	0	0	0	0	0	0	0	0	0	0	0	0	0	0	0	0	0	0	0	0	0	0	0	0	0	0	0	0	0	0	0	0	0	0	0	0	0	0
7	DRIL78.009	6.2946	56.6521	6.4455	0.210221	32.3484	590.754	0	2	0	0	0	0	0	2	2	2	2	2	2	2	2	2	-1	0	-1	2	-1	-1	-1	0	0	0	0	0	0	0	-1	0	0	2	2	0	0	0	2	2	2	2
8	DRIL78.010	6.00895	46.4899	5.91614	0.329968	38.1082	426.464	0	0	0	0	0	0	0	0	0	0	0	0	0	0	0	0	0	0	0	0	0	0	0	0	0	0	0	0	0	0	0	0	0	0	0	2	0	0	0	0	0	0
9	DRIL78.011	6.3555	53.6277	6.06587	0.181005	32.0521	571.479	0	0	-1	0	0	0	0	0	0	0	0	0	0	0	0	0	0	0	0	0	0	0	0	0	0	0	0	0	0	0	0	0	0	0	2	0	0	0	0	0	0	0
10	DRIL78.012	6.60212	53.3679	6.02759	0.327448	33.8694	851.664	0	0	0	0	0	0	0	0	0	0	0	0	0	0	0	0	0	0	0	0	0	0	0	0	0	0	0	0	0	0	0	0	0	0	0	0	0	0	0	0	0	0
11	DRIL78.013	6.02953	53.4683	5.44745	-0.45305	32.1328	651.471	0	0	0	0	0	0	0	0	0	0	0	0	0	0	0	0	0	0	0	0	0	0	0	0	0	0	0	0	0	0	0	0	0	0	0	0	0	0	0	0	0	0
12	DRIL78.014	5.76921	46.9355	6.29518	0.416913	36.0038	432.967	0	0	0	0	0	0	0	0	0	0	0	0	0	0	0	0	0	0	0	0	0	0	2	0	0	0	0	0	0	0	0	0	0	0	0	0	0	0	0	0	0	0
13	DRIL78.015	5.37381	55.7876	4.81772	-1.46889	28.5182	566.45	0	0	0	0	0	0	2	2	2	2	0	0	2	2	2	2	2	2	2	2	2	2	0	0	0	0	0	0	0	0	0	0	0	0	0	0	0	0	0	0	0	0
14	DRIL78.016	5.76067	56.5875	6.8177	0.13981	41.1295	587.02	0	2	2	2	2	2	2	2	2	2	2	2	0	0	0	0	0	0	0	-1	0	0	0	0	0	0	0	0	0	0	0	0	0	0	0	0	0	0	0	0	0	0
15	DRIL78.017	5.96731	53.7478	5.67921	-0.346887	32.1728	595.801	0	0	0	0	0	0	0	0	0	0	0	0	0	0	0	0	0	0	0	0	0	0	0	0	0	0	0	0	0	0	0	0	0	0	0	0	0	0	0	2	2	2
16	DRIL78.018	5.79833	64.8272	6.12779	-0.872953	34.7716	630.443	0	0	0	0	0	0	0	0	0	0	0	0	0	0	0	0	0	0	0	0	0	0	0	0	0	0	0	0	2	2	2	2	0	0	0	0	0	0	0	0	0	0
17	DRIL78.019	6.51544	39.6766	5.90425	1.09558	15.1531	580.535	0	0	0	0	0	0	0	0	0	0	0	0	0	0	0	0	0	0	0	0	0	0	0	0	0	0	0	0	0	0	0	0	0	0	0	0	0	0	0	0	0	0
18	DRIL78.020	6.37481	50.9313	6.22913	0.488188	36.1068	532.401	0	0	0	0	0	0	0	0	0	0	0	0	0	0	0	0	0	0	0	0	0	0	0	0	0	0	0	0	0	0	0	0	0	2	2	2	0	0	0	0	0	0
19	DRIL78.021	5.27112	53.4269	6.62059	-0.0998774	40.0783	638.971	0	0	0	0	2	2	2	0	0	0	0	0	0	0	0	0	0	0	0	0	0	2	0	0	0	0	0	0	0	0	0	0	0	0	0	0	0	0	0	0	0	0
20	DRIL78.022	6.20982	62.6038	5.92733	-0.606335	27.0338	622.804	2	0	0	0	0	0	0	0	0	0	0	0	0	0	0	0	0	0	0	0	0	0	0	0	0	0	0	0	0	0	0	0	0	0	0	0	0	0	0	0	0	0
21	DRIL78.024	5.59698	55.0652	5.62624	-0.706689	40.8432	529.414	0	0	0	0	0	0	0	0	0	0	0	0	0	0	0	0	0	0	0	0	0	0	0	0	0	0	0	0	0	0	0	0	0	0	0	0	0	0	0	0	0	0
22	DRIL78.025	5.2554	55.4464	5.90777	-0.749078	20.3304	651.127	0	0	0	0	0	0	0	0	0	0	0	0	0	0	0	0	0	0	0	0	0	0	0	0	0	0	0	0	0	0	0	0	0	0	0	0	0	0	0	0	0	0
23	DRIL78.026	5.42516	51.8033	6.16494	-0.21707	34.9368	603.223	0	0	0	0	0	0	0	0	0	0	0	0	0	0	0	0	0	0	0	0	0	0	0	0	0	0	0	0	0	0	0	0	2	2	2	0	0	0	0	0	0	0
24	DRIL78.027	5.17514	58.1715	5.53481	-1.24534	20.6157	607.426	0	0	0	0	0	0	0	0	0	0	0	0	0	0	0	0	0	0	0	0	0	0	0	0	0	0	0	0	0	0	0	0	0	0	0	0	0	0	0	0	0	0
25	DRIL78.028	5.59347	49.0842	6.3768	0.220478	28.7153	503.71	0	0	0	0	0	0	0	2	2	2	2	2	0	0	0	0	0	0	0	0	0	0	0	0	0	0	0	0	0	0	0	0	0	0	0	0	0	0	0	0	0	0
26	DRIL78.030	6.44767	58.3408	5.39077	-0.552218	49.8557	532.958	0	0	0	0	0	0	0	0	0	0	0	0	0	0	0	0	0	0	0	0	0	0	0	0	0	0	0	0	0	0	0	0	0	0	0	0	0	0	0	0	0	0
27	DRIL78.031	5.9892	57.4945	6.25569	-0.173791	34.9568	617.405	0	0	0	0	0	0	0	0	0	0	0	0	0	0	0	0	0	0	0	0	0	0	0	0	0	0	0	0	0	0	0	0	0	0	0	0	0	0	0	0	0	0
28	DRIL78.032	5.66359	53.229	6.34074	-0.0362417	42.1632	556.634	0	0	0	0	0	0	0	0	0	0	0	0	0	0	0	0	0	0	0	0	0	0	0	0	0	0	0	0	0	0	0	0	0	0	0	0	0	0	0	0	0	0
29	DRIL78.033	6.00465	52.8287	6.39475	0.244767	40.7061	379.607	0	0	0	0	0	0	0	0	0	0	0	0	0	0	0	0	0	0	0	0	0	0	0	0	0	0	0	0	2	0	0	0	0	0	0	0	0	0	0	0	0	0
30	DRIL78.034	5.55113	62.0274	6.10958	-0.856324	31.3079	662.513	0	0	0	0	0	0	0	0	0	0	0	0	0	0	0	0	0	0	0	0	0	0	0	0	0	0	0	0	0	0	0	0	0	0	0	0	0	0	0	0	0	0
31	DRIL78.035	5.91316	54.3017	6.51114	0.17128	37.4856	522.234	0	0	2	2	0	0	0	0	0	0	0	0	0	0	0	0	0	0	0	0	0	0	0	0	0	0	0	0	0	0	0	0	0	0	0	0	0	0	0	0	0	0
32	DRIL78.036	5.90059	57.1818	5.93195	-0.438483	32.0611	658.097	0	0	0	0	0	0	0	0	0	0	0	0	0	0	0	0	0	0	0	0	0	0	0	0	0	0	0	0	0	0	0	0	0	0	0	0	0	0	0	0	0	0
33	DRIL78.037	7.34323	56.1824	6.46271	0.918177	42.9523	486.074	0	0	0	0	0	0	0	0	0	0	0	0	0	0	0	0	0	0	0	0	0	0	0	0	0	0	0	0	0	0	0	0	0	0	0	0	0	0	0	0	0	0
34	DRIL78.038	5.28994	49.2862	6.48022	0.0879616	26.5395	459.566	0	0	0	0	0	2	0	0	0	0	0	0	0	0	0	0	0	0	0	0	0	0	0	0	0	0	0	0	0	0	0	0	0	0	0	0	0	0	0	0	0	0
35	DRIL78.039	5.23925	51.18	5.29379	-0.910534	20.9613	694.023	0	0	0	0	0	0	2	2	2	2	0	0	0	0	0	0	0	0	0	2	2	0	0	0	0	0	0	0	0	0	0	0	0	0	0	0	0	0	0	0	0	0
36	DRIL78.040	5.01453	54.1886	5.99766	-0.754397	36.4679	637.449	0	0	0	0	0	0	0	0	0	0	0	0	0	0	0	0	0	0	0	0	0	0	0	0	0	0	0	0	0	0	0	0	0	0	0	0	0	0	0	0	0	0
37	DRIL78.041	5.53431	56.1031	5.63139	-0.811774	27.5042	635.221	0	0	0	0	0	0	0	0	0	0	0	0	0	0	0	0	0	0	0	0	0	0	0	0	0	0	0	0	0	0	0	0	0	0	0	0	0	0	0	0	0	0
38	DRIL78.043	5.72906	56.3702	6.59114	-0.026262	37.1339	605.26	0	0	0	0	0	0	0	0	0	0	0	0	0	0	0	0	0	0	0	0	0	0	0	0	0	0	0	0	0	2	2	2	2	2	2	2	0	0	0	0	0	0
39	DRIL78.044	4.52426	61.4651	6.16734	-1.42876	22.5502	483.293	0	0	0	0	0	0	0	0	0	0	0	0	0	0	0	0	0	0	0	0	0	0	0	0	0	0	0	0	0	0	0	0	2	0	0	0	0	0	0	0	0	0
40	DRIL78.045	5.93726	58.0289	5.92154	-0.478948	37.4573	427.664	0	0	0	0	0	0	0	0	0	0	0	0	0	0	0	0	0	0	0	0	0	0	0	0	0	0	0	0	0	0	0	0	0	0	0	0	0	0	0	0	0	0
41	DRIL78.046	5.78356	50.589	6.13552	0.0699626	25.5147	633.256	0	0	0	0	0	0	0	0	0	0	0	0	0	0	0	0	0	0	0	0	0	0	0	0	0	0	0	0	0	0	0	0	0	0	0	0	0	0	0	0	0	0
42	DRIL78.047	5.93477	56.4068	6.14093	-0.217251	36.0939	587.334	0	0	0	0	0	0	0	0	0	0	0	0	0	0	0	0	0	0	0	0	0	0	0	0	0	0	0	0	0	0	0	0	0	0	0	2	0	0	0	0	0	0
43	DRIL78.048	5.27182	56.7582	5.80217	-0.900709	41.5787	656.884	2	2	0	0	0	0	0	0	0	0	0	0	0	0	0	0	0	0	0	0	0	0	0	0	0	0	0	0	0	0	0	0	0	0	0	0	0	0	0	0	0	0
44	DRIL78.049	5.90536	52.3368	5.88665	-0.145373	25.9827	594.468	0	0	0	0	0	0	0	0	0	0	0	0	0	0	0	0	0	0	0	0	0	0	0	0	0	0	0	0	0	0	0	0	0	0	0	0	0	0	0	0	0	2
45	DRIL78.050	5.67016	54.7259	7.05123	0.371671	34.1436	499.135	0	0	0	0	0	-1	0	0	0	0	0	0	0	0	0	0	0	0	0	0	0	0	0	0	0	0	0	0	0	0	0	0	0	0	0	0	0	0	0	0	0	0
46	DRIL78.051	6.09067	50.3362	6.45418	0.507122	38.3145	305.275	0	0	0	0	0	0	0	0	0	0	0	0	0	0	0	0	0	0	0	0	0	0	0	0	0	0	0	0	0	0	0	0	0	0	0	0	0	0	0	0	0	0
47	DRIL78.052	6.39897	53.1986	7.03496	0.923564	22.8194	669.842	0	2	0	0	0	-1	-1	-1	0	0	0	2	0	0	0	0	0	0	0	0	0	0	0	0	0	0	0	0	0	0	0	0	0	0	0	0	0	0	0	0	0	0
48	DRIL78.054	6.96007	54.0898	6.43407	0.794226	24.2467	694.628	0	0	0	0	0	0	0	0	0	0	0	0	0	0	0	0	0	0	0	0	0	0	0	0	0	0	0	0	0	0	0	0	0	0	0	0	0	0	0	0	0	0
49	DRIL78.055	6.42515	50.4573	6.47083	0.722826	28.3423	480.384	0	0	0	0	0	0	0	0	0	0	0	0	0	0	0	0	0	0	0	0	0	0	2	2	2	2	2	2	2	2	2	2	0	0	0	0	0	0	0	0	0	0
50	DRIL78.056	5.38348	49.1697	5.81041	-0.319496	26.4728	445.652	0	0	0	0	0	0	0	0	0	0	0	0	0	0	0	0	0	0	0	0	0	0	0	0	0	0	0	0	0	0	0	0	0	0	0	0	0	0	0	0	0	0
51	DRIL78.057	4.68578	56.4217	5.86526	-1.20502	36.4699	598.938	0	0	0	0	0	0	0	0	0	0	0	0	0	0	0	0	0	0	0	0	0	0	0	0	0	0	0	0	0	0	0	0	0	0	0	0	0	0	0	0	0	0
52	DRIL78.058	5.57525	52.3067	6.36055	-0.0168636	37.6713	517.533	0	0	2	2	0	0	0	0	0	0	0	0	0	0	0	0	0	0	0	0	0	0	0	0	0	0	0	0	0	0	0	0	0	0	0	0	0	0	0	0	0	0
53	DRIL78.060	5.77466	60.0151	6.42433	-0.3579	40.6155	829.773	0	0	0	0	0	0	0	2	2	2	2	2	2	2	2	2	2	2	2	0	0	0	0	0	0	0	0	0	0	0	0	0	0	0	0	0	0	0	0	0	0	0
54	DRIL78.061	5.90253	56.7937	5.83882	-0.47742	43.2363	759.581	0	0	0	0	0	0	0	0	0	0	0	0	0	0	0	0	0	0	0	0	0	0	0	0	0	0	0	0	0	0	0	0	0	0	0	0	0	0	0	0	0	0
55	DRIL78.062	5.42935	55.8592	5.81456	-0.732313	29.7912	672.963	0	0	0	0	0	0	0	0	0	0	0	0	0	0	0	0	0	0	0	0	0	0	0	0	0	0	0	0	0	0	0	0	0	0	0	0	0	0	0	0	0	0
56	DRIL78.063	4.6335	58.7845	5.59036	-1.59	32.9608	530.4	0	0	0	0	0	0	0	0	0	0	0	0	0	0	0	0	0	0	0	0	0	0	0	0	0	0	0	0	0	0	0	0	0	0	0	0	0	0	0	0	0	0
57	DRIL78.064	6.27575	47.3501	6.71057	1.0046	41.6127	533.147	0	0	0	0	0	0	0	0	0	0	0	0	0	0	0	0	0	0	0	0	0	0	2	2	2	0	0	2	2	0	0	0	0	0	0	0	0	0	0	0	0	0
58	DRIL78.065	5.64503	50.464	6.18306	0.0241656	33.7446	590.881	0	0	0	0	0	0	0	0	0	0	0	0	0	0	0	0	0	0	0	0	0	0	0	0	0	0	0	0	0	0	0	0	0	0	0	0	0	0	0	0	0	0
59	DRIL78.066	6.00173	58.2887	5.82604	-0.523017	38.3731	484.082	0	0	0	0	0	0	0	0	0	0	0	0	0	0	0	0	0	0	0	0	0	0	0	0	0	0	0	0	0	0	0	0	0	0	0	0	0	0	0	0	0	0
60	DRIL78.067	6.24099	53.789	6.09201	0.116233	44.6207	592.425	0	0	0	0	0	0	0	0	0	0	0	0	0	0	0	0	0	2	2	0	0	0	0	0	0	0	0	0	0	0	0	0	0	0	0	0	0	0	0	0	0	0
61	DRIL78.068	5.8653	50.2635	5.95871	0.0181578	40.9351	537.286	0	0	0	0	0	0	0	0	0	0	0	0	0	0	0	0	0	0	0	0	0	0	0	0	0	0	0	0	0	0	0	0	0	0	0	0	0	0	0	0	0	0
62	DRIL78.069	6.35511	45.3267	5.72699	0.492691	36.8427	610.414	0	0	0	0	0	0	0	0	0	0	0	0	0	0	0	0	0	0	0	0	0	0	0	0	0	0	0	0	0	0	0	0	0	0	0	0	0	0	0	0	0	0
63	DRIL78.070	6.23838	56.4459	5.52749	-0.461991	28.4422	709.496	0	0	0	0	0	0	0	0	0	0	0	0	0	0	0	0	0	0	0	0	0	0	0	0	0	0	0	0	0	0	0	0	0	0	0	0	0	0	0	0	0	0
64	DRIL78.071	5.79632	52.9129	5.77498	-0.331884	33.6117	677.807	0	0	0	0	0	0	0	0	0	0	0	0	0	0	0	0	0	0	0	0	0	0	0	0	0	0	0	0	0	0	0	0	0	-1	0	0	0	0	0	0	0	0
65	DRIL78.073	5.98946	46.0947	6.66868	0.876976	35.6841	541.245	0	0	0	0	2	0	0	0	0	0	0	0	0	0	0	0	0	0	0	0	0	0	0	0	0	0	0	0	0	0	0	0	0	0	0	0	0	0	0	0	0	0
66	DRIL78.076	5.7721	53.7869	5.74541	-0.426297	38.2839	720.596	0	0	0	0	0	0	0	0	0	0	0	0	0	0	0	0	0	0	0	0	0	0	0	0	0	0	0	0	0	0	0	0	0	0	0	0	0	0	0	0	0	0
67	DRIL78.077	5.51089	58.6447	6.02823	-0.71451	28.5378	577.048	0	0	0	0	0	0	0	0	0	0	0	0	0	0	0	0	0	0	0	0	0	0	0	0	0	0	0	0	0	0	0	0	0	0	0	0	0	0	0	0	0	0
68	DRIL78.079	5.68058	59.4071	5.85011	-0.783853	36.4649	547.424	0	0	0	0	0	0	0	0	0	0	0	0	0	0	0	0	0	0	0	0	0	0	0	0	0	0	0	0	0	0	0	0	0	0	0	0	0	0	0	0	0	0
69	DRIL78.080	6.28428	57.8481	5.8533	-0.295351	34.9991	671.483	0	2	0	0	0	0	0	0	0	0	0	0	0	0	0	0	0	0	0	0	0	0	0	0	0	0	0	0	2	2	0	0	0	0	0	0	0	0	0	0	0	0
70	DRIL78.082	6.58824	54.2417	6.0438	0.272032	45.1694	551.647	0	0	0	0	0	0	0	2	0	0	0	0	0	0	0	0	0	0	0	2	0	0	0	0	0	0	0	0	0	0	0	0	0	0	0	0	0	0	0	0	0	0
71	DRIL78.083	5.542	60.2242	6.14732	-0.715469	33.0598	518.045	0	0	0	0	0	0	0	0	0	0	0	0	0	0	0	0	0	0	0	0	0	0	0	0	0	0	0	0	0	0	0	0	0	0	0	0	0	0	0	0	0	0
72	DRIL78.084	5.98022	57.428	6.25414	-0.176158	16.7399	638.309	0	0	0	0	0	0	0	0	0	0	0	0	0	0	0	0	0	0	0	0	0	0	0	0	0	0	0	0	0	0	0	0	0	0	0	0	0	0	0	0	0	0
73	DRIL78.087	6.50349	56.2899	5.4667	-0.326679	29.8731	577.768	0	0	0	0	0	0	0	0	0	0	0	0	0	0	0	0	0	0	0	0	0	0	0	0	0	0	0	0	0	0	0	0	0	0	0	0	0	0	0	0	0	0
74	DRIL78.089	5.90191	53.6399	6.7704	0.391821	33.4654	371.042	0	2	0	0	0	0	0	0	0	0	0	0	0	0	0	0	0	0	0	0	0	0	0	0	0	0	0	0	0	0	0	0	0	0	0	0	0	0	0	0	0	0
75	DRIL78.092	5.69522	59.1231	5.89503	-0.723871	34.0239	719.664	0	0	0	0	0	0	0	0	0	0	0	0	0	0	0	0	0	0	0	0	0	0	0	0	0	0	0	0	0	0	0	0	0	0	0	0	0	0	0	0	0	0
76	DRIL78.093	6.48718	58.07	5.7195	-0.276307	35.8056	606.484	0	0	0	0	0	0	0	0	0	0	0	0	0	0	0	0	0	0	0	0	0	0	0	0	0	0	0	0	0	0	0	0	0	0	0	0	0	0	0	0	0	0
77	DRIL78.094	5.65252	51.2091	6.76235	0.389713	18.5983	451.383	0	0	0	0	2	0	0	0	0	0	0	0	0	0	0	0	0	0	0	0	0	0	0	0	0	0	0	0	0	0	0	0	0	0	0	0	0	0	0	0	0	0
78	DRIL78.095	6.34924	52.2279	6.34129	0.465216	19.5315	596.352	0	0	0	0	0	0	0	0	0	0	0	0	0	0	0	0	0	0	0	0	0	0	0	0	0	0	0	0	0	0	0	0	0	0	0	0	2	2	2	2	2	2
79	DRIL78.096	5.99628	56.1751	6.21757	-0.108568	44.0103	573.162	0	0	0	0	0	0	0	0	0	0	0	0	0	0	0	0	0	0	0	0	0	0	0	0	0	0	0	0	0	0	0	0	0	0	0	0	0	0	0	0	0	0
80	DRIL78.097	5.53137	61.4849	6.73616	-0.38892	47.4047	622.135	0	0	0	0	0	0	2	2	2	2	2	2	2	2	2	2	2	2	2	2	2	2	2	2	2	2	2	2	2	0	0	0	0	0	0	0	0	0	0	0	0	0
81	DRIL78.098	6.10336	59.5831	5.92541	-0.474292	38.5762	708.932	0	0	0	0	0	0	0	0	0	0	0	0	0	0	0	0	0	0	0	0	0	0	0	0	0	0	0	0	0	0	0	0	0	0	0	0	0	0	0	0	0	0
82	DRIL78.099	6.54573	59.5994	6.95501	0.534302	38.8233	256.824	0	0	0	0	0	-1	2	0	0	0	0	0	0	0	0	0	0	0	0	0	0	2	2	-1	0	0	0	0	0	0	0	0	0	0	0	0	0	0	0	2	0	0
83	DRIL78.100	7.24253	54.4296	6.1016	0.715107	39.0023	398.167	0	0	0	0	0	0	0	0	0	0	0	0	0	0	0	0	0	0	0	0	0	0	0	0	0	0	0	0	0	0	0	0	0	0	0	0	0	0	2	2	2	2
84	DRIL78.101	5.3821	60.851	6.90328	-0.322984	28.4765	857.921	2	2	2	2	2	2	2	2	2	2	0	0	0	0	0	0	0	0	0	0	0	0	0	0	0	0	0	0	0	0	0	0	0	0	0	0	0	0	0	0	0	0
85	DRIL78.102	6.18233	53.9498	6.78925	0.562277	31.6388	721.107	0	0	0	0	0	-1	-1	2	-1	0	0	0	2	2	2	2	2	2	2	2	2	2	0	0	0	0	0	0	0	0	0	0	0	0	0	0	0	0	0	0	2	0
86	DRIL78.103	6.29195	46.3605	6.12025	0.6625	36.3129	582.65	0	0	0	0	0	0	0	0	0	0	0	0	0	0	0	0	0	0	0	0	0	0	0	0	0	0	0	0	0	0	0	0	0	0	0	0	0	0	0	0	0	0
87	DRIL78.104	6.19912	56.899	6.45653	0.141105	28.3296	483.061	0	0	0	0	0	0	0	0	0	0	0	0	0	0	0	0	0	0	0	0	0	0	0	0	0	0	0	0	0	0	0	0	0	0	0	0	0	0	0	0	0	0
88	DRIL78.105	6.19505	55.5674	6.12929	-0.00473837	47.8782	368.778	0	0	0	0	0	0	0	2	0	0	2	2	0	0	0	0	0	0	0	0	0	0	0	0	0	0	0	0	0	0	0	0	0	0	0	0	0	0	2	2	0	0
89	DRIL78.106	6.04229	51.7069	6.03381	0.0875377	34.4576	339.736	2	2	2	0	2	2	2	0	0	0	0	0	0	0	0	0	0	0	0	2	0	2	0	0	0	0	0	0	0	0	0	0	0	0	0	0	0	0	0	0	0	0
90	DRIL78.109	6.16362	54.3674	4.99025	-0.751718	42.332	589.181	0	0	0	0	0	0	0	0	0	0	0	0	0	0	0	0	0	0	0	0	0	0	0	0	0	0	0	0	0	0	0	0	0	0	0	0	0	0	0	0	0	0
91	DRIL78.110	7.26577	50.1938	5.84241	0.827908	31.359	741.03	0	0	0	0	0	0	0	0	0	0	0	0	0	0	0	0	0	0	0	0	0	0	0	0	0	0	0	0	0	0	0	0	0	0	0	0	0	0	0	0	0	0
92	DRIL78.111	5.98481	55.8743	5.98871	-0.257956	45.2175	437.242	0	0	0	0	0	0	0	0	0	0	0	0	0	0	0	0	0	0	0	0	0	0	0	0	0	0	0	0	0	0	0	0	0	0	0	0	0	0	0	0	0	0
93	DRIL78.112	6.41657	55.1259	5.9772	0.0572724	48.1796	727.884	0	0	0	0	0	0	0	2	2	2	0	0	2	2	2	2	2	2	2	2	2	2	0	0	0	0	0	0	0	0	0	0	0	0	0	0	0	0	0	0	2	2
94	DRIL78.113	6.00519	54.2433	5.58681	-0.421282	41.8701	608.861	0	0	0	0	0	0	0	0	0	0	0	0	0	0	0	0	0	0	0	0	0	0	0	0	0	0	0	0	0	0	0	0	0	0	2	-1	0	0	0	0	0	0
95	DRIL78.114	6.46943	56.806	5.42088	-0.415039	37.0825	952.736	0	0	0	0	0	0	0	0	0	0	0	0	0	0	0	0	0	0	0	0	0	0	2	2	2	2	2	2	2	2	2	2	2	0	0	0	0	0	0	0	0	0
96	DRIL78.115	6.28117	51.9749	6.56876	0.600041	18.8707	522.179	0	0	0	0	0	0	0	0	0	0	0	0	0	0	0	0	0	0	0	0	0	0	0	0	0	0	0	0	0	0	0	0	0	0	0	0	2	2	0	0	0	0
97	DRIL78.116	6.16125	54.6791	5.93141	-0.107258	27.5976	484.538	0	0	0	0	0	0	0	0	0	0	0	0	0	0	0	0	0	0	0	0	0	0	0	0	0	0	0	0	0	0	0	0	0	0	0	0	0	0	0	0	0	0
98	DRIL78.117	5.69449	50.7876	5.95477	-0.127722	29.5855	688.263	0	0	0	0	0	0	0	0	0	0	0	0	0	0	0	0	0	0	0	0	0	0	0	0	0	0	0	0	0	0	0	0	0	0	0	0	0	0	0	0	0	0
99	DRIL78.118	5.05544	48.0184	6.12713	-0.226463	24.5304	689.628	0	0	0	0	0	0	0	0	0	0	0	0	0	0	0	0	0	0	0	0	0	0	0	0	0	0	0	0	0	0	0	0	0	0	0	0	0	0	0	0	0	0
100	DRIL78.121	5.86916	57.6723	5.01807	-1.13839	38.8584	641.522	0	0	0	0	0	0	0	0	0	0	0	0	0	0	0	0	0	0	0	0	0	0	0	0	0	0	0	0	0	0	0	0	0	0	0	0	0	0	0	0	0	0
101	DRIL78.122	5.45406	49.9387	6.55436	0.201088	30.3813	423.322	0	0	0	0	0	0	0	0	0	0	0	0	0	0	0	0	0	0	0	0	0	0	0	0	0	0	0	0	0	0	0	0	0	0	0	0	0	0	0	0	0	0
102	DRIL78.123	5.7346	48.384	5.75524	-0.0838189	35.3687	647.211	0	0	0	0	0	0	0	0	0	0	0	0	0	0	0	0	0	0	0	0	0	0	0	0	0	0	0	0	0	0	0	0	0	0	0	0	0	0	0	0	0	0
103	DRIL78.124	5.81989	59.7475	5.73956	-0.796514	43.2789	677.611	0	0	0	0	0	0	0	0	0	0	0	0	0	0	0	0	0	0	0	0	0	0	0	0	0	0	0	0	0	0	0	0	0	0	0	0	0	0	0	0	0	0
104	DRIL78.125	7.10191	46.0224	5.94833	1.07648	36.9031	596.802	0	0	0	0	0	0	0	0	0	0	0	0	0	0	0	0	0	0	0	0	0	0	0	0	0	0	0	0	0	0	0	0	0	0	0	0	0	0	0	0	0	0
105	DRIL78.126	6.30284	47.1555	6.0811	0.588803	28.1487	405.659	0	0	0	0	0	2	2	0	0	0	0	0	0	0	0	0	0	0	0	0	0	2	2	2	0	0	0	0	0	0	0	0	0	2	2	2	0	0	0	0	0	0
106	DRIL78.127	5.61589	55.8312	6.22947	-0.318325	36.3411	530.91	0	0	0	0	0	0	0	0	0	0	0	0	0	0	0	0	0	0	0	2	2	2	2	2	2	2	2	0	0	0	0	0	0	0	0	0	0	0	0	0	0	0
107	DRIL78.128	5.4759	54.26	6.21753	-0.311021	32.3966	514.598	0	0	0	0	0	0	0	0	0	0	0	0	0	0	0	0	-1	-1	-1	0	0	0	0	0	0	0	0	0	0	0	0	0	0	0	0	0	0	0	0	0	0	0
108	DRIL78.129	5.51992	51.2355	6.80495	0.334109	27.8865	606.161	0	0	0	0	0	0	0	0	0	0	0	0	0	0	0	0	0	0	0	0	0	0	0	0	0	0	0	0	0	0	0	0	0	0	0	0	0	0	0	0	0	0
109	DRIL78.130	5.5185	63.8279	5.75576	-1.24737	36.9614	582.05	0	0	0	0	0	0	0	0	0	0	0	0	0	0	0	0	0	0	0	0	0	0	0	0	0	0	0	0	0	0	0	0	0	0	0	0	0	0	0	0	0	0
110	DRIL78.131	6.0844	52.7027	5.8686	-0.0690307	33.7801	564.095	0	0	0	0	0	0	0	0	0	0	0	0	0	0	0	0	0	0	0	0	0	0	0	0	0	0	0	0	0	0	0	0	0	0	0	0	0	0	0	0	0	0
111	DRIL78.132	5.4607	48.2324	5.81614	-0.204177	18.1254	366.677	0	0	0	0	0	0	0	0	0	0	0	0	0	0	0	0	0	0	0	0	0	0	0	0	0	0	0	0	0	0	0	0	0	0	0	0	0	0	0	0	0	0
112	DRIL78.134	6.1665	52.3638	7.05942	0.849085	35.6301	388.824	0	0	2	2	2	2	2	0	0	0	0	0	0	0	0	0	0	0	0	0	0	0	0	0	0	0	0	0	0	0	0	0	0	0	0	0	0	0	0	0	0	0
113	DRIL78.136	5.7369	56.4961	5.62764	-0.712183	42.256	635.318	0	0	0	0	0	0	0	0	0	0	0	0	0	0	0	0	0	0	0	0	0	0	0	0	0	0	0	0	0	0	0	0	0	0	0	0	0	0	0	0	0	0
114	DRIL78.137	6.00571	56.5796	6.33476	-0.0464822	36.7022	625.231	0	0	0	0	0	0	0	0	0	0	0	0	0	0	0	0	0	0	0	0	0	0	0	0	0	0	0	0	0	0	0	0	0	0	0	0	0	0	0	0	0	0
115	DRIL78.139	6.26727	46.7979	5.99751	0.530828	27.4873	508.299	0	0	0	0	0	0	0	0	2	2	0	0	0	0	0	0	0	0	0	0	0	0	0	0	0	0	0	0	2	2	0	0	0	0	0	0	0	0	0	0	0	0
116	DRIL78.140	7.64842	45.1309	6.4014	1.80304	22.4741	626.433	0	0	0	0	0	0	0	0	0	0	0	0	0	0	0	0	0	0	0	0	0	0	0	0	0	0	0	0	0	0	0	0	-1	2	2	0	0	0	0	0	0	0
117	DRIL78.141	6.33642	55.5126	6.57311	0.402893	25.309	540.079	0	0	0	0	0	0	0	0	0	0	0	0	0	0	0	0	0	0	0	0	0	0	0	0	2	2	2	2	2	2	2	2	0	2	2	2	0	0	0	0	0	0
118	DRIL78.142	6.7968	57.443	5.72004	-0.0380208	35.8013	767.875	0	0	0	0	0	0	0	0	0	0	0	0	0	0	0	0	0	0	0	2	2	2	0	0	0	0	0	0	0	0	0	0	0	0	0	0	0	0	0	0	0	0
119	DRIL78.143	5.94833	56.4718	5.57408	-0.614518	33.1873	678.595	0	0	0	0	0	0	0	0	0	0	0	0	0	0	0	0	0	0	0	0	0	0	0	0	0	0	0	0	0	0	0	0	0	0	0	0	0	0	0	0	0	0
120	DRIL78.144	6.83434	52.0533	4.73312	-0.354941	30.191	794.78	0	0	0	0	0	0	0	0	0	0	0	0	0	0	0	0	0	0	0	0	0	0	0	0	0	0	0	0	0	0	0	0	0	0	0	0	0	0	0	0	0	0
121	DRIL78.145	6.02329	51.2788	5.45815	-0.303825	29.0201	673.391	0	0	0	0	0	0	0	0	0	0	0	0	0	0	0	0	0	0	0	0	0	0	0	0	0	0	0	0	0	0	0	0	0	0	0	0	0	0	0	0	0	0
122	DRIL78.147	5.92354	55.2591	6.37415	0.0171621	31.4952	552.919	0	0	0	0	0	0	0	0	0	0	0	0	0	0	0	0	0	0	0	0	0	0	0	0	0	0	0	0	0	0	-1	0	0	0	0	0	0	0	0	0	0	0
123	DRIL78.148	5.4899	48.7958	6.81168	0.482084	16.8225	393.145	0	0	0	0	2	2	2	0	0	0	0	0	0	0	0	0	0	0	0	0	0	0	0	0	0	0	0	0	0	0	0	0	0	0	0	0	0	0	0	0	0	0
124	DRIL78.149	6.94692	54.5847	5.97795	0.429873	32.9902	652.073	0	0	0	0	0	0	0	0	0	0	0	0	0	0	0	0	0	0	0	0	0	0	0	0	0	0	0	0	0	0	0	0	0	0	0	0	0	0	0	0	0	0
125	DRIL78.150	6.29771	54.2405	5.78851	-0.0928403	37.9216	634.751	0	0	0	0	0	0	0	0	0	0	0	0	0	0	0	0	0	0	0	0	0	0	0	0	0	0	0	0	0	0	0	0	0	0	0	0	0	0	0	0	0	0
126	DRIL78.151	5.5335	48.9892	4.3215	-1.26714	24.0389	517.908	0	0	0	0	0	0	0	0	0	0	0	0	0	0	0	0	0	0	0	0	0	0	0	0	0	0	0	0	0	0	0	0	0	0	0	0	0	0	0	0	0	0
127	DRIL78.152	5.62426	42.9897	5.68827	0.157518	25.5364	420.178	0	0	0	0	0	0	0	0	0	0	0	0	0	0	0	0	0	0	0	0	0	0	0	0	0	0	0	2	0	0	0	0	0	0	0	0	0	0	0	0	0	0
128	DRIL78.159	6.4482	47.7429	5.7975	0.440968	32.8516	604.039	0	0	0	0	0	0	0	0	0	0	0	0	0	0	0	0	0	0	0	0	0	0	0	0	-1	-1	2	2	0	0	0	0	0	0	0	0	0	0	-1	-1	0	0
129	DRIL78.161	6.18452	61.2023	5.2599	-1.00196	36.169	530.158	0	0	0	0	0	0	0	0	0	0	0	0	0	0	0	0	0	0	0	0	0	0	0	0	0	0	0	0	0	0	0	0	0	0	0	0	0	0	0	0	0	0
130	DRIL78.162	5.68687	57.1909	5.91753	-0.584737	18.8598	627.28	0	0	0	0	0	0	0	0	0	0	0	0	0	0	0	0	0	0	0	0	0	0	0	0	0	0	0	0	0	0	0	0	0	0	0	0	0	0	0	0	0	0
131	DRIL78.164	6.39505	50.8399	7.14791	1.15794	21.1734	405.86	2	2	2	2	2	0	0	0	0	0	0	0	0	0	0	0	0	0	0	0	0	0	0	0	0	0	0	0	0	0	0	0	0	0	0	0	2	2	2	2	2	2
132	DRIL78.165	5.72233	55.2938	6.04661	-0.344678	32.5334	633.861	0	0	0	0	0	0	0	0	0	0	0	0	0	0	0	0	0	0	0	0	0	0	0	0	0	0	0	0	0	0	0	0	0	0	0	0	2	2	2	0	0	0
133	DRIL78.166	6.2423	51.6038	6.12436	0.285279	33.4718	533.744	2	2	2	0	0	0	0	0	0	0	0	0	0	0	0	0	0	0	0	0	0	0	0	0	0	0	0	0	0	0	0	0	0	0	0	0	0	0	0	0	0	0
134	DRIL78.168	6.49691	49.4434	6.56776	0.904393	37.0245	641.482	0	0	0	0	0	0	0	0	0	0	0	0	2	2	2	2	2	2	2	2	2	2	0	0	0	0	0	0	0	0	0	0	0	0	0	0	0	0	0	0	0	0
135	DRIL78.170	4.85945	47.0828	5.75484	-0.552174	34.7411	381.982	0	0	0	0	0	0	0	0	0	0	0	0	0	0	0	0	0	0	0	0	0	0	0	0	0	0	0	0	0	0	0	0	0	0	0	0	0	0	0	0	0	0
136	DRIL78.171	5.97436	58.5185	7.12611	0.365295	34.1759	669.438	0	0	0	0	0	2	0	0	0	0	0	2	2	2	2	2	2	2	2	2	2	2	2	2	2	0	0	0	0	0	2	2	2	0	0	-1	2	2	0	0	0	0
137	DRIL78.172	6.3445	59.5173	6.41005	0.0262039	40.8576	725.578	0	0	0	0	0	0	0	0	0	0	0	0	0	0	0	0	0	0	0	0	0	0	0	0	0	0	0	0	0	0	0	0	0	0	0	0	0	0	0	0	0	0
138	DRIL78.173	5.50312	54.8178	6.35631	-0.232556	44.7684	621.989	0	0	0	0	0	0	0	0	0	0	0	0	0	0	0	0	0	0	0	0	0	0	0	0	0	0	0	0	0	0	0	0	0	0	0	0	0	0	0	0	0	0
139	DRIL78.175	5.5396	46.5476	7.02897	0.816999	27.3862	257.505	0	0	0	0	0	0	0	0	0	0	0	0	0	0	0	0	0	0	0	0	0	2	2	0	0	0	0	0	0	0	0	0	0	0	0	0	0	0	0	0	0	0
140	DRIL78.176	6.54655	49.9939	6.39304	0.775475	33.6019	493.881	0	2	0	0	0	0	0	0	0	0	0	0	0	0	0	0	0	0	0	0	0	0	0	0	0	0	0	0	0	0	0	0	0	0	0	0	0	0	0	0	0	0
141	DRIL78.177	5.78555	51.7363	5.91024	-0.164652	34.9265	471.242	0	0	0	0	0	0	0	0	0	0	0	0	0	0	0	0	0	0	0	0	0	0	0	0	0	0	0	0	0	0	0	0	0	0	0	0	0	0	0	0	0	0
142	DRIL78.179	5.81745	53.2395	6.12775	-0.0903227	30.935	522.86	0	0	0	0	0	0	0	0	0	0	0	0	0	0	0	0	0	0	0	0	0	0	0	0	0	0	0	0	0	0	0	0	0	0	0	0	0	0	0	0	0	2
143	DRIL78.180	6.08137	57.8	6.30504	-0.100741	28.279	463.531	0	0	0	0	0	0	0	0	0	0	0	0	0	0	0	0	0	0	0	0	0	0	0	0	0	0	0	0	0	0	0	0	0	0	0	0	0	0	0	0	0	0
144	DRIL78.183	6.53096	49.4249	6.24711	0.700059	24.2634	479.347	0	0	0	0	0	0	0	0	0	0	0	0	0	0	0	0	0	0	0	0	0	0	0	0	0	0	0	0	0	0	0	0	0	0	0	0	0	0	0	0	0	0
145	DRIL78.184	5.66832	59.8038	6.24178	-0.540556	41.4469	530.096	0	0	0	0	2	2	2	2	2	2	2	0	0	0	0	0	0	0	0	0	0	0	0	0	2	2	2	2	0	0	0	0	0	0	0	0	0	0	0	0	0	0
146	DRIL78.185	6.09302	52.7082	6.42741	0.331923	39.1589	717.2	0	2	2	2	0	0	0	0	0	0	0	0	0	0	0	0	0	0	0	0	0	0	0	0	0	0	0	0	0	0	0	0	0	0	0	0	0	0	0	0	0	0
147	DRIL78.186	6.7092	59.6236	6.09133	0.0244771	45.5697	945.26	0	0	0	0	0	0	0	0	0	0	0	0	0	0	0	0	0	0	0	0	0	0	0	0	0	0	0	0	0	0	0	0	0	0	0	0	0	0	0	0	0	0
148	DRIL78.187	5.52928	59.4575	5.49503	-1.13462	44.3471	728.56	0	0	0	0	0	0	0	0	0	0	0	0	0	0	0	0	0	0	0	0	0	0	0	0	0	0	0	0	0	0	0	0	0	0	0	0	0	0	0	0	0	0
149	DRIL78.188	6.11581	55.4848	5.38738	-0.575008	47.2651	690.127	0	0	0	0	0	0	0	0	0	0	0	0	0	0	0	0	0	0	0	0	0	0	0	0	0	0	0	0	0	0	0	0	0	0	0	0	2	2	0	0	0	0
150	DRIL78.189	6.93436	54.5427	5.67788	0.212148	32.0749	407.557	2	0	0	0	0	0	0	0	0	0	0	0	0	0	0	0	0	0	0	0	0	0	0	0	0	0	0	0	0	0	0	0	0	0	0	0	0	0	0	0	0	0
151	DRIL78.190	5.64307	60.1659	5.95219	-0.78577	38.7003	488.723	0	0	0	0	0	0	0	0	0	0	0	0	0	0	0	0	0	0	0	0	0	0	0	0	0	0	0	0	2	2	2	0	0	0	0	0	0	0	0	0	0	0
152	DRIL78.191	6.14582	52.5694	5.95206	0.0378802	11.8204	593.355	2	2	2	0	0	0	0	0	0	0	0	0	0	0	0	0	0	0	0	0	0	0	0	0	0	0	0	0	0	0	0	0	0	0	0	0	0	0	0	0	0	0
153	DRIL78.192	5.48365	54.5834	6.02171	-0.466336	31.1831	639.679	0	0	0	0	0	0	0	0	0	0	0	0	0	0	0	0	0	0	0	0	0	0	0	0	0	0	0	0	0	0	0	0	0	0	0	0	0	0	0	0	0	0
154	DRIL78.194	6.08846	53.556	5.61251	-0.304604	24.4606	528.543	0	0	0	0	0	0	0	0	0	0	0	0	0	0	0	0	0	0	0	0	0	0	0	0	0	0	0	0	0	0	0	0	0	0	0	0	0	0	0	0	0	0
155	DRIL78.195	6.01192	52.5725	5.98894	-0.0210543	29.1027	526.17	0	0	0	0	0	0	0	0	0	0	0	0	0	0	0	0	0	0	0	0	0	0	0	0	0	0	0	0	0	0	0	0	0	0	0	0	0	0	0	0	0	0
156	DRIL78.196	6.08581	40.3359	6.53039	1.22302	16.1441	475.947	0	0	0	2	2	2	2	2	2	2	0	0	0	0	0	0	0	0	0	0	0	0	0	0	0	0	0	0	0	0	0	0	0	0	0	0	0	0	0	0	0	0
157	DRIL78.197	6.14582	50.495	5.75344	0.0351256	32.0922	564.548	0	0	0	0	0	0	0	0	0	0	0	0	0	0	0	0	0	0	0	0	0	0	0	0	0	0	0	0	0	0	0	0	0	0	0	0	0	0	0	0	0	0
158	DRIL78.198	7.25014	52.427	5.77787	0.623789	30.8414	636.719	0	0	0	0	0	0	0	0	0	0	0	0	0	0	0	0	0	0	0	0	0	0	0	0	0	0	0	2	2	2	2	2	2	0	0	0	0	0	0	0	0	0
159	DRIL78.199	7.31098	51.7007	5.48587	0.503784	30.9853	579.092	0	0	0	0	0	0	0	0	0	0	0	0	0	0	0	0	0	0	0	0	0	0	0	0	0	0	0	0	0	0	0	0	0	0	0	0	0	0	0	0	0	0
160	DRIL78.200	6.11687	51.9701	5.58448	-0.201003	41.2715	486.466	0	0	0	0	0	0	0	0	0	0	0	0	2	2	2	2	2	2	2	0	0	0	0	0	0	0	0	0	0	0	0	0	0	0	0	0	0	0	0	0	0	0
161	DRIL78.204	6.55301	44.4563	6.33164	1.1043	43.2937	413.683	2	2	0	0	0	0	0	0	0	0	0	2	0	0	0	0	0	0	0	0	0	0	0	0	0	0	0	0	0	0	0	0	0	0	0	0	0	0	0	0	0	0
162	DRIL78.207	7.15298	56.0628	6.48416	0.820764	46.6725	655.756	0	0	0	0	2	2	2	0	0	0	0	0	2	0	2	2	2	2	2	2	0	2	0	0	0	0	0	0	0	0	0	0	0	0	0	0	0	0	0	0	0	0
163	DRIL78.211	6.54425	45.0652	5.95834	0.793825	26.8702	491.489	0	0	0	0	2	0	0	0	0	0	0	0	0	0	0	0	0	0	0	0	0	0	0	0	0	0	0	0	0	0	0	0	0	0	0	2	0	0	0	0	0	0
164	DRIL78.212	5.5998	35.8575	6.72017	1.34726	47.895	265.156	0	0	0	0	2	2	-1	0	0	0	0	0	0	0	0	0	0	0	0	0	0	0	0	0	0	0	0	0	0	0	0	0	0	0	0	0	0	0	0	0	0	0
165	DRIL78.217	6.15233	51.0231	6.21497	0.331065	20.8174	384.761	0	0	0	0	0	0	2	0	0	0	0	0	0	0	0	0	0	0	0	0	0	0	2	0	0	0	0	0	0	0	0	0	0	0	2	2	0	0	2	0	2	0
166	DRIL78.219	5.57866	47.9889	5.49635	-0.339765	24.9609	542.547	0	0	0	0	0	0	0	0	0	0	0	0	0	0	0	0	0	0	0	0	0	0	0	0	0	0	0	0	0	0	0	0	0	0	0	0	0	0	0	0	0	0
167	DRIL78.220	6.16383	58.214	5.96713	-0.315383	25.4195	478.638	0	0	0	0	2	2	2	2	2	2	0	0	0	0	0	0	0	0	0	0	0	2	0	0	0	0	0	0	0	0	0	0	0	0	0	0	0	0	0	0	2	0
168	DRIL78.222	6.5027	58.653	5.90623	-0.172959	38.5966	995.867	0	2	2	0	0	-1	2	0	0	0	2	2	2	0	2	2	2	0	0	0	0	0	0	0	0	0	0	0	0	0	0	0	0	0	0	0	0	0	0	0	0	0
169	DRIL78.224	5.70913	47.5616	5.88376	0.0457682	40.5414	675.199	0	2	2	0	0	0	0	0	0	0	0	0	0	0	0	0	0	0	0	2	2	2	0	0	0	0	0	0	0	2	0	0	0	0	0	0	0	0	0	0	2	0
170	DRIL78.228	6.76876	54.9047	6.87558	0.931556	31.4433	380.768	0	0	0	0	0	0	0	0	0	0	0	0	0	0	0	0	0	0	0	0	0	0	0	0	0	0	0	0	0	0	0	0	0	0	0	0	0	0	0	0	0	0
171	DRIL78.229	5.84394	47.4954	6.02324	0.234403	31.5793	418.787	0	0	0	0	0	0	2	0	0	0	0	0	0	0	0	0	0	0	0	0	0	0	0	0	0	0	0	0	0	0	0	0	0	2	2	2	0	0	0	0	0	0
172	DRIL78.231	6.18008	58.0117	5.57677	-0.568152	38.9184	541.624	0	2	0	0	0	0	0	0	0	0	0	0	0	0	0	0	0	0	0	0	0	0	0	0	0	0	0	0	0	0	0	0	0	0	2	0	0	0	0	0	0	0
173	DRIL78.232	6.00283	46.9025	6.40114	0.642209	34.1267	478.783	0	0	0	0	0	0	0	0	0	0	0	0	0	0	0	0	0	0	0	0	0	2	0	0	0	0	0	0	0	0	0	0	0	0	0	0	0	0	0	0	0	0
174	DRIL78.233	6.38395	43.3492	7.09442	1.61112	28.5058	420.694	0	0	0	0	2	2	2	0	0	0	0	0	0	0	0	0	0	0	0	0	0	2	0	0	0	0	0	0	0	0	0	0	0	0	0	0	0	0	0	0	0	0
175	DRIL78.234	5.78726	50.2135	5.83155	-0.118049	39.065	508.43	0	0	0	0	0	0	0	0	0	0	0	0	0	0	0	0	0	0	0	0	0	0	0	0	0	0	0	0	0	0	0	0	0	0	-1	2	0	0	0	0	0	0
176	DRIL78.235	6.08009	47.4855	6.40737	0.656819	30.9949	443.515	0	0	0	0	0	0	0	0	0	0	0	0	0	0	0	0	0	0	0	0	0	0	0	0	0	0	0	0	0	0	0	0	0	0	0	0	0	0	0	0	0	0
177	DRIL78.236	6.13236	49.6796	6.64249	0.710591	35.2181	509.736	0	2	0	0	0	0	0	0	0	0	0	0	0	0	0	0	0	0	0	0	0	0	0	0	0	0	0	0	2	2	2	2	2	0	0	0	2	0	0	0	0	0
178	DRIL78.237	6.328	55.2147	6.57113	0.415961	46.4385	702.271	0	0	0	0	2	2	2	2	2	2	2	2	2	2	2	2	2	2	2	0	0	0	2	2	2	2	2	0	0	0	0	0	0	0	0	0	2	0	0	0	0	0
179	DRIL78.238	6.62053	41.9436	5.45076	0.69018	33.8622	798.738	0	2	0	0	0	0	0	0	0	0	0	0	0	0	0	0	0	0	0	0	0	0	0	0	0	0	0	0	0	0	0	0	0	0	0	0	0	0	0	0	0	0
180	DRIL78.239	5.3264	56.8393	5.51302	-1.07633	29.0777	339.996	0	0	0	0	0	0	0	0	0	0	0	0	0	0	0	0	0	0	0	0	0	0	0	0	0	0	0	0	0	0	0	0	0	0	0	0	0	0	2	0	0	0
181	DRIL78.241	5.16269	49.1423	6.62085	0.116508	23.0099	375.118	0	0	0	0	2	2	0	0	0	0	0	0	0	0	0	0	0	0	0	0	0	0	0	0	0	0	0	0	0	0	0	0	0	0	0	0	0	0	0	0	0	0
182	DRIL78.243	6.02454	51.3752	6.80754	0.646434	23.1757	1054.17	0	2	2	-1	0	0	-1	-1	-1	-1	-1	2	2	0	-1	2	0	0	0	0	0	0	0	0	0	0	0	0	0	0	0	0	0	2	-1	-1	0	0	2	0	-1	2
183	DRIL78.245	6.32944	52.5784	5.98787	0.179012	36.6621	581.765	0	0	0	0	0	0	0	0	0	0	0	0	0	0	0	0	0	0	0	0	0	0	0	0	0	0	0	0	0	0	0	0	0	0	2	2	2	2	2	0	2	0
184	DRIL78.246	6.3134	53.2103	6.13541	0.231337	28.7267	490.956	0	2	2	0	0	0	0	0	0	0	0	0	0	0	0	0	0	0	0	0	0	0	0	0	0	0	0	0	0	0	0	0	0	0	0	0	0	0	0	0	2	0
185	DRIL78.249	5.80534	59.0683	5.78561	-0.72795	30.2028	383.755	0	0	0	0	0	0	0	0	0	0	2	2	0	0	0	0	0	0	0	2	2	2	0	0	0	2	2	0	2	2	0	0	0	0	0	0	0	0	0	0	0	0
186	DRIL78.250	6.54757	55.5608	6.05804	0.16863	42.5863	760.244	0	0	0	0	0	0	0	0	0	0	0	0	0	0	0	0	2	2	2	2	0	0	0	0	0	0	0	0	0	0	0	0	0	0	0	0	0	0	0	0	0	0
187	DRIL78.253	6.77059	53.274	6.42262	0.720291	25.3888	495.464	0	0	0	0	0	2	2	0	0	0	0	0	0	0	0	0	0	0	0	0	0	0	0	0	0	0	0	0	0	0	0	0	0	0	0	0	0	0	0	0	0	0
188	DRIL78.255	6.85276	47.6024	6.26236	1.03598	51.1876	481.659	0	0	0	0	2	2	2	0	0	0	0	0	0	0	0	0	0	0	0	0	0	0	0	0	0	0	0	0	0	0	0	0	0	0	0	0	2	2	2	2	2	2
189	DRIL78.258	6.76926	46.8398	5.49352	0.489144	31.3867	619.37	0	0	0	0	0	0	0	0	2	2	2	2	2	2	2	2	2	2	2	0	0	0	0	0	0	0	0	0	0	0	0	0	0	0	0	0	0	0	0	0	0	0
190	Oh7B	5.80893	55.6129	5.70643	-0.551993	36.473	519.414	0	0	0	0	0	0	0	0	0	0	0	0	0	0	0	0	0	0	0	0	0	0	0	0	0	0	0	0	0	0	0	0	0	0	0	0	0	0	0	0	0	0
[truncated: 198 more columns]

## Sheet: DRIL_markerID_master
MarkerID	MarkerName	Chr	cM	Population
M1	PHM175-25	1	4.92	NC344xOh7B
M2	PHM2244-142	1	18.97	NC344xOh7B
M3	PZA00175-2	1	25.86	NC344xOh7B
M4	PZA00447-6	1	26.37	NC344xOh7B
M5	PHM4531-46	1	48.66	NC344xOh7B
M6	PHM3951-25	1	64.24	NC344xOh7B
M7	PZA00192-6	1	68.84	NC344xOh7B
M8	PHM12323-17	1	96.25	NC344xOh7B
M9	PHM574-14	1	98.03	NC344xOh7B
M11	PHM5481-94	1	103.92	NC344xOh7B
M12	PZA00714-1	1	106.15	NC344xOh7B
M13	PHM12633-15	1	116.2	NC344xOh7B
M14	PHM3463-18	1	116.2	NC344xOh7B
M17	PZA00205-7	1	117.3	NC344xOh7B
M18	PHM4695-5	1	118.88	NC344xOh7B
M20	PZA02191-1	1	130.87	NC344xOh7B
M21	PHM14519-8	1	132.27	NC344xOh7B
M22	PHM5727-5	1	144.8	NC344xOh7B
M23	PHM1438-34	1	174.76	NC344xOh7B
M24	PZA00289-11	1	180.38	NC344xOh7B
M25	PZA00403-5	1	188.01	NC344xOh7B
M26	PHM759-24	1	193.56	NC344xOh7B
M28	PHM16605-19	1	211.26	NC344xOh7B
M29	PHM5526-25	1	221.8	NC344xOh7B
M30	PZA00364-2	1	224.3	NC344xOh7B
M31	PZB00114-1	1	231.08	NC344xOh7B
M32	PZA01978-23	1	231.42	NC344xOh7B
M33	PZA02957-5	1	237.82	NC344xOh7B
M34	PZA00623-2	1	260.32	NC344xOh7B
M35	PHM9807-9	1	264	NC344xOh7B
M36	PZA00856-2	1	270.62	NC344xOh7B
M37	PZA00680-3	2	3.78	NC344xOh7B
M38	PHM5817-15	2	4.15	NC344xOh7B
M39	PHM13440-11	2	10.45	NC344xOh7B
M40	PHM5628-11	2	18.12	NC344xOh7B
M41	PZA00396-9	2	22.08	NC344xOh7B
M42	PZA00200-8	2	25.88	NC344xOh7B
M43	PHM5822-15	2	35.42	NC344xOh7B
M44	PZA02337-4	2	52.18	NC344xOh7B
M45	PHM4425-25	2	67.33	NC344xOh7B
M46	PHM7964-27	2	75.72	NC344xOh7B
M47	PHM4586-12	2	79.29	NC344xOh7B
M49	PHM10321-11	2	96.4	NC344xOh7B
M52	PHM13360-13	2	98.62	NC344xOh7B
M54	PHM4620-24	2	100.16	NC344xOh7B
M55	PHM13648-11	2	100.25	NC344xOh7B
M56	PZA01537-2	2	102.37	NC344xOh7B
M57	PZA01321-1	2	105.29	NC344xOh7B
M58	PZA00824-2	2	117.77	NC344xOh7B
M59	PHM14412-4	2	127.4	NC344xOh7B
M60	PZA02964-7	2	140.26	NC344xOh7B
M61	PZA00804-1	2	144.57	NC344xOh7B
M62	PZA02418-2	2	151.79	NC344xOh7B
M63	PZA02727-1	2	175.79	NC344xOh7B
M64	PZA00672-6	2	179.84	NC344xOh7B
M65	PZA00309-1	3	0	NC344xOh7B
M66	PZA02090-1	3	18.28	NC344xOh7B
M67	PZA03527-1	3	25.89	NC344xOh7B
M68	PHM15475-27	3	30.77	NC344xOh7B
M69	PHM2343-25	3	67.95	NC344xOh7B
M70	PZA00348-11	3	68.94	NC344xOh7B
M71	PHM15474-5	3	72.2	NC344xOh7B
M72	PZA00627-1	3	72.2	NC344xOh7B
M73	PHM5502-31	3	78.21	NC344xOh7B
M74	PZA00109-3	3	79.28	NC344xOh7B
M75	PHM4339-79	3	87	NC344xOh7B
M77	PHM4955-12	3	89.62	NC344xOh7B
M78	PHM9914-11	3	95.07	NC344xOh7B
M79	PZA00667-1	3	96.67	NC344xOh7B
M80	PHM1959-26	3	105.64	NC344xOh7B
M81	PZA02402-1	3	106.26	NC344xOh7B
M82	PZA00494-2	3	134.14	NC344xOh7B
M83	PZA00236-7	3	139.99	NC344xOh7B
M85	PHM9672-9	3	156.18	NC344xOh7B
M86	PZA02665-2	3	183.3	NC344xOh7B
M87	PZA02824-4	3	184.53	NC344xOh7B
M88	PHM2672-19	3	193.1	NC344xOh7B
M89	PHM3852-15	3	202.7	NC344xOh7B
M90	PZA00088-3	3	209.21	NC344xOh7B
M91	PHM13174-18	3	209.57	NC344xOh7B
M92	PZA00216-2	4	9.36	NC344xOh7B
M93	PHM2438-28	4	16.54	NC344xOh7B
M94	PZA00975-1	4	44.03	NC344xOh7B
M95	PZA02138-1	4	48.91	NC344xOh7B
M96	PHM259-11	4	52.47	NC344xOh7B
M97	PZA00139-4	4	64.67	NC344xOh7B
M98	PZA03043-14	4	70.2	NC344xOh7B
M100	PHM4469-13	4	71.34	NC344xOh7B
M102	PZA01751-2	4	71.51	NC344xOh7B
M103	PHM14055-6	4	76.05	NC344xOh7B
M104	PZA02027-1	4	82.37	NC344xOh7B
M105	PZA00663-5	4	82.48	NC344xOh7B
M107	PHM15864-8	4	87.18	NC344xOh7B
M108	PZA01926-1	4	90.25	NC344xOh7B
M109	PZA00492-26	4	91.78	NC344xOh7B
M110	PZA01187-1	4	110.16	NC344xOh7B
M111	PHM4348-16	4	129.05	NC344xOh7B
M112	PZA02779-1	4	133.22	NC344xOh7B
M113	PZA01332-2	4	137.84	NC344xOh7B
M114	PZA00399-10	4	139.63	NC344xOh7B
M115	PHM4310-112	4	170.65	NC344xOh7B
M116	PZA01887-1	5	9.6	NC344xOh7B
M117	PZA00684-12	5	9.62	NC344xOh7B
M118	PHM662-27	5	10.72	NC344xOh7B
M119	PHM14671-9	5	30.54	NC344xOh7B
M120	PHM3103-47	5	48.74	NC344xOh7B
M122	PHM9676-10	5	55.32	NC344xOh7B
M124	PZA03092-7	5	64.27	NC344xOh7B
M125	PZA00112-4	5	68.34	NC344xOh7B
M126	PHM565-31	5	82.66	NC344xOh7B
M128	PZA00981-3	5	89.15	NC344xOh7B
M131	PHM4165-14	5	92.51	NC344xOh7B
M132	PZA02818-10	5	95.42	NC344xOh7B
M133	PZA00524-2	5	98	NC344xOh7B
M134	PZA01796-1	5	104.87	NC344xOh7B
M135	PHM1899-157	5	121	NC344xOh7B
M136	PZA02209-2	5	124.04	NC344xOh7B
M137	PHM5296-6	5	124.09	NC344xOh7B
M138	PZA02383-1	5	131.51	NC344xOh7B
M139	PHM532-23	5	134.8	NC344xOh7B
M140	PZA03024-16	5	142.77	NC344xOh7B
M141	PHM563-9	5	156.01	NC344xOh7B
M142	PHM4349-3	5	156.11	NC344xOh7B
M143	PZA02817-15	5	156.69	NC344xOh7B
M144	PHM13639-13	5	156.74	NC344xOh7B
M145	PHM3019-38	6	1.5	NC344xOh7B
M146	PZA00503-5	6	13.2	NC344xOh7B
M147	PZA02948-21	6	15.92	NC344xOh7B
M148	PZA00462-2	6	16.3	NC344xOh7B
M149	PZA00540-3	6	16.3	NC344xOh7B
M151	PHM8327-18	6	18.6	NC344xOh7B
M152	PHM13020-10	6	52.06	NC344xOh7B
M154	PZA01618-2	6	55.31	NC344xOh7B
M155	PZA00357-19	6	57.51	NC344xOh7B
M156	PZA01462-1	6	88.36	NC344xOh7B
M157	PHM4748-16	6	96.93	NC344xOh7B
M158	PHM16607-11	6	99.59	NC344xOh7B
M159	PZA01468-1	6	101.49	NC344xOh7B
M160	PHM4978-27	6	109.61	NC344xOh7B
M161	PZA02688-2	6	117.98	NC344xOh7B
M162	PHM5529-4	6	126.27	NC344xOh7B
M164	PHM9241-13	7	36.81	NC344xOh7B
M165	PHM3078-12	7	41.99	NC344xOh7B
M166	PHM4135-15	7	44.5	NC344xOh7B
M167	PHM4080-15	7	72.8	NC344xOh7B
M168	PHM15501-6	7	72.81	NC344xOh7B
M169	PHM15501-9	7	72.81	NC344xOh7B
M170	PHM4353-31	7	72.82	NC344xOh7B
M171	PHM4818-15	7	72.86	NC344xOh7B
M172	PHM904-21	7	72.86	NC344xOh7B
M173	PZA01946-7	7	80.65	NC344xOh7B
M174	PZA00670-2	7	109.17	NC344xOh7B
M175	PHM10225-15	7	153.35	NC344xOh7B
M176	PZA01802-3	7	158.71	NC344xOh7B
M177	PZA00043-1	7	164.09	NC344xOh7B
M178	PZA02174-2	8	15.71	NC344xOh7B
M179	PHM2487-6	8	28.92	NC344xOh7B
M180	PZA02955-3	8	40.83	NC344xOh7B
M181	PHM5158-13	8	45.11	NC344xOh7B
M182	PHM6428-11	8	51.56	NC344xOh7B
M183	PHM2350-14	8	55.4	NC344xOh7B
M185	PHM191-12	8	59.03	NC344xOh7B
M187	PZA01257-1	8	59.63	NC344xOh7B
M188	PHM11114-7	8	59.75	NC344xOh7B
M189	PHM4134-8	8	65.36	NC344xOh7B
M190	PZA00045-1	8	70.3	NC344xOh7B
M191	PHM3993-16	8	70.81	NC344xOh7B
M192	PHM5805-19	8	71	NC344xOh7B
M193	PHM10525-11	8	79.85	NC344xOh7B
M195	PHM448-23	8	82.47	NC344xOh7B
M196	PZA00429-1	8	86.28	NC344xOh7B
M197	PZA00177-4	8	91.84	NC344xOh7B
M198	PHM232-30	8	99.2	NC344xOh7B
M199	PHM1834-47	8	101.74	NC344xOh7B
M200	PZA02746-2	8	104.22	NC344xOh7B
M201	PHM4560-54	8	105.55	NC344xOh7B
M202	PZA00904-1	8	116.3	NC344xOh7B
M203	PHM3337-23	8	140.94	NC344xOh7B
M205	PHM5019-59	8	142.85	NC344xOh7B
M206	PZA03062-7	9	6.45	NC344xOh7B
M207	PZA02344-1	9	37.83	NC344xOh7B
M208	PHM5181-10	9	43.9	NC344xOh7B
M209	PHM5185-13	9	47.48	NC344xOh7B
M210	PHM4495-14	9	59.01	NC344xOh7B
M211	PHM1871-19	9	60.81	NC344xOh7B
M212	PZA00588-2	9	61.08	NC344xOh7B
M214	PZA01819-1	9	114.26	NC344xOh7B
M215	PZA00060-2	9	114.49	NC344xOh7B
M216	PHM4905-6	9	114.68	NC344xOh7B
M217	PHM4689-49	9	114.89	NC344xOh7B
M218	PHM816-25	9	115.15	NC344xOh7B
M220	PHM11226-13	9	115.16	NC344xOh7B
M221	PZA01715-1	9	115.19	NC344xOh7B
M222	PHM1911-173	9	128.22	NC344xOh7B
M223	PHM2828-83	10	28.88	NC344xOh7B
M224	PHM5740-9	10	33.06	NC344xOh7B
M225	PZA01451-1	10	33.12	NC344xOh7B
M226	PHM1752-36	10	33.46	NC344xOh7B
M227	PZA00463-3	10	38.09	NC344xOh7B
M228	PHM3896-9	10	38.39	NC344xOh7B
M229	PZA02945-10	10	42.44	NC344xOh7B
M230	PHM537-22	10	52.9	NC344xOh7B
M231	PHM13687-14	10	57.18	NC344xOh7B
M232	PZA00647-9	10	61.49	NC344xOh7B
M233	PZA01456-2	10	69.42	NC344xOh7B
M235	PZA00727-11	10	95.91	NC344xOh7B
M236	PZA00130-9	10	97.06	NC344xOh7B
M237	PHM5435-25	10	100.26	NC344xOh7B
M238	PZA01073-1	10	101.88	NC344xOh7B
M240	PHM10750-26	10	126.59	NC344xOh7B
